# Supplementary material
Source: Springer Nature journal article supplement (https://www.springermedizin.de/resource/supplementary/13058_2009_2432_MOESM4_ESM.pdf/9701396)
Supplement: MOESM4 [file 9701396]

**Supplemental methods 1: Pseudo-code for the two-level external cross-validation scheme.**

**Input:**

- expression matrix X and the corresponding label vector y;
- feature selection method F;
- classifier C;
- set of candidate numbers of features;
- the number of repeats R;
- the number of folds K;

**Output:** performance estimation

**For** r = 1,...,R **do:**

**For** k = 1,...,K **do:**

        -generate the current training set by discarding the k-th fold:

        X\_tr = X \ X<sup>(k)</sup>; y\_tr = y \ y<sup>(k)</sup>;

        -find the optimal number of features:

        nf = **optimal\_number\_of\_features** (X\_tr, y\_tr, F, C, S);

        -select top nf features according to the feature selection method F:

        Z = **get\_top\_features**(X\_tr, y\_tr, F, nf);

        -build the current model:

        model = **train\_classifier**(Z, y\_tr, C);

        -predict the labels for y<sup>(k)</sup> and save them;

**End for**

        -use the save predictions for measuring the performance (error rate, AUC, ...)

**End for**

**Return** performance statistics (average error rate, average AUC, ...)

**Function**

**optimal\_number\_of\_features**(X, Y, F, C, S):

**For** r = 1,...,R **do:**

**For** k = 1,...,K **do:**

        -generate the current training set by discarding the k-th fold:

        X\_tr = X \ X<sup>(k)</sup>; y\_tr = y \ y<sup>(k)</sup>;

**For** n in S **do:**

            -select top nf features according to the feature selection method F:

            Z =

**get\_top\_features**(X\_tr, y\_tr, F, n);

        -build the current model:

        model =

**train\_classifier**(Z, y\_tr, C);

        -predict the labels for y<sup>(k)</sup> and save them;

**End for**

**End for**  
        -from the predicted labels compute the area under the ROC curve for every n and for

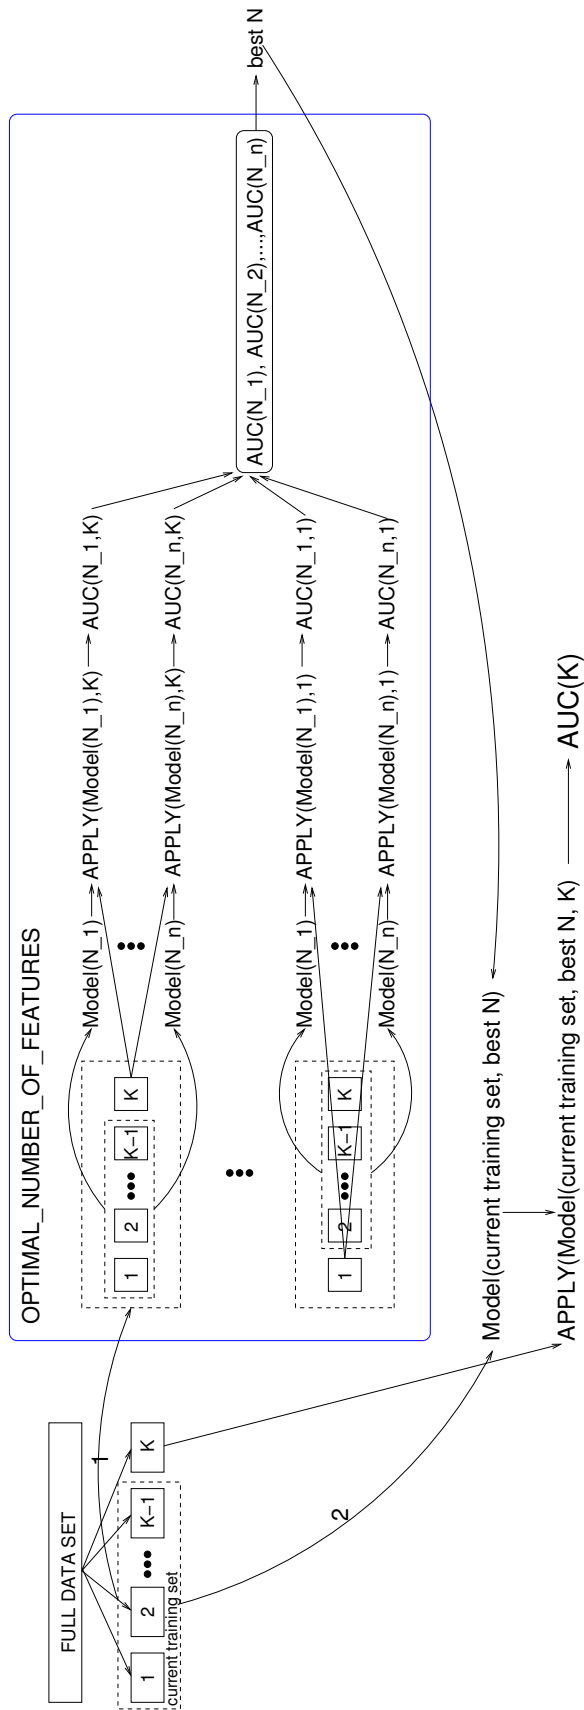

**Schematic representation of the nested cross-validation approach.** For a given partition of the full data set in the outer cross-validation, an inner cross-validation is performed to estimate to optimal number of features (the one that maximizes the AUC). Then, in the outer cross-validation, a model with the optimal number of features is constructed on the current training set and it is apply on the left-out fold (here the K-th). Repeating this scheme leads to K estimates of the performance, which are averaged to obtain the final performance estimation.
